# Supplementary material for: Complete functional mapping of infection- and vaccine-elicited antibodies against the fusion peptide of HIV
Source: PLoS Pathog. 2018 Jul 5;14(7):e1007159. doi: 10.1371/journal.ppat.1007159 (PMC6049957; doi:10.1371/journal.ppat.1007159)
Supplement: S3 File — The VRC34.01 differential selection values for all measured mutations. The format is described at https://jbloomlab.github.io/dms_tools2/diffsel.html and in Dingens et al 2017 [13]. (CSV) [file ppat.1007159.s017.csv]

site	wildtype	mutation	mutdiffsel
515	I	P	2.4473625097626113
85	H	Q	2.44543061467873
88	N	T	2.4242174465618587
513	V	P	2.363351520854188
515	I	S	2.2862061941620193
88	N	G	2.2788006985428133
85	H	V	2.2048454830247426
524	G	S	2.0803019356201515
524	G	V	2.0357864999324873
512	A	L	1.980414847726962
516	G	L	1.9783132383737643
88	N	S	1.9608279579293626
515	I	T	1.9574074442464957
90	T	R	1.94782280329557
524	G	A	1.933146001221064
88	N	H	1.891978360441702
90	T	N	1.8624647783261927
512	A	E	1.8423463528694635
88	N	R	1.8389361291715574
513	V	L	1.82777330010913
345	V	A	1.8269196453232661
90	T	V	1.814209011199678
516	G	A	1.794965894666195
491	I	Y	1.7940031902220825
44	V	L	1.789371635914614
403	Q	I	1.7574195771060177
524	G	I	1.7479215907879655
287	Q	H	1.7451392703475903
90	T	A	1.7414657136247664
407	S	K	1.7394197600133698
515	I	Y	1.729885434007477
88	N	A	1.6970992467104198
516	G	V	1.6797771080100654
90	T	G	1.6468741138590453
512	A	M	1.6393655938957128
90	T	K	1.6341097520140924
90	T	I	1.6339013603795438
513	V	G	1.6204565071945962
356	N	I	1.6197810894747011
88	N	F	1.6063816596420692
513	V	S	1.6008229599731711
229	K	M	1.5973777924299064
92	E	A	1.5810404762391357
88	N	L	1.5800796544588005
516	G	E	1.565396624672787
229	K	R	1.5624134621763428
84	I	H	1.5553550863836767
90	T	H	1.5513020115422347
524	G	Q	1.5476777746173958
84	I	L	1.5403954869716174
512	A	G	1.5402755116384417
330	H	C	1.5390334535726644
85	H	N	1.5389666980328993
515	I	M	1.5357351406421436
513	V	N	1.5331906905450743
49	E	C	1.5275238479809743
514	G	V	1.5226860845835297
229	K	S	1.5197784454157741
519	F	V	1.5173249063219807
229	K	L	1.4974224738236337
243	S	R	1.4784527132193819
515	I	F	1.4753803717755072
85	H	D	1.474645057105251
524	G	H	1.468267697737717
513	V	A	1.460441098878332
243	S	D	1.4600511015554518
85	H	S	1.458991714032277
518	V	W	1.4505476778471131
512	A	T	1.4499799001627283
513	V	F	1.443854959086801
305	K	T	1.4420614977538588
516	G	Y	1.4396966142185776
519	F	L	1.4314385243802028
88	N	Q	1.4214842902828262
629	L	P	1.4149516935719335
204	A	P	1.40554591960249
220	P	S	1.405162766117183
524	G	E	1.40276183842719
401	S	I	1.4019270486412538
524	G	T	1.4011765393696693
514	G	I	1.3945140692887967
393	S	A	1.3880568970011742
47	D	Y	1.386641977880721
599	S	Y	1.384286799444229
519	F	I	1.3731946231173955
44	V	I	1.372426748721546
263	G	A	1.367300133377751
536	T	M	1.366779722739469
369	L	K	1.3573853504413738
518	V	F	1.3541699272126695
86	L	N	1.3507900059894336
243	S	Q	1.345171106282264
88	N	W	1.3435577806549066
88	N	E	1.3418380755446924
512	A	V	1.3369330104773565
90	T	L	1.3365820117184062
90	T	E	1.3331055838431167
335	K	E	1.331795423049949
274	S	P	1.3279553493773604
526	A	G	1.3263575141727968
515	I	A	1.3256711114776905
88	N	K	1.3215329374734068
184g	R	E	1.3196534307617585
85	H	L	1.3164202082541765
85	H	K	1.3064276574358338
587	L	Q	1.3050191340022326
514	G	Y	1.3031595049368847
335	K	W	1.302017313615
545	L	I	1.3017119462896094
513	V	T	1.2975815605037824
539	V	E	1.2972558480871665
515	I	G	1.2960933022638805
524	G	F	1.2816444812783665
516	G	I	1.2764263762935533
512	A	Y	1.2737727701488413
52	L	V	1.2657250058290281
171	K	H	1.2630909095208027
521	G	S	1.2630696342176124
557	R	G	1.2625210139536451
516	G	P	1.2596188300143127
229	K	T	1.259179731927628
155	K	Q	1.2583338416373893
242	V	L	1.2563981115482528
88	N	M	1.250677055787856
347	K	Y	1.2489488801144382
514	G	L	1.2456914200120448
90	T	Y	1.2388785223965342
647	E	F	1.2386026654238393
260	L	I	1.2373671803460913
172	V	S	1.2360415144094132
560	E	D	1.2343298658353459
198	T	V	1.230669951084435
223	F	N	1.229790011543602
334	S	Y	1.2268204007856032
516	G	N	1.2266791027107573
599	S	N	1.225931815192754
176	F	Y	1.2256342270125247
514	G	P	1.2178923816082632
355	N	R	1.217841100101542
224	A	G	1.2175863336426938
600	G	H	1.2165466972328154
85	H	F	1.216045175181817
516	G	Q	1.2151509602676727
222	G	K	1.210094839080348
90	T	Q	1.2095438912553722
629	L	A	1.2079818900266386
518	V	L	1.207171973372053
684	I	T	1.2066658653854028
330	H	K	1.2058190486314007
48	A	K	1.2042169266245537
320	G	N	1.1991751602808816
94	N	C	1.1985566394058818
516	G	K	1.1982451848492788
602	L	I	1.1953032097510015
513	V	M	1.1917742834550187
121	K	I	1.1872755057046858
189	K	P	1.1840294978891
536	T	K	1.179538023180855
85	H	R	1.1783943494127813
178	R	Y	1.1782601650406654
84	I	R	1.1754978851924927
251	I	H	1.1709607728550187
229	K	I	1.1687158308523267
512	A	Q	1.166570092927274
456	R	I	1.1647183006702968
398	N	I	1.1628439845060177
351	K	D	1.1616260655224209
275	E	R	1.1602283057286813
99	N	H	1.1596952870438284
288	F	V	1.1539880520399648
265	L	Q	1.1425936307489895
56	S	A	1.1419471797391163
346	V	M	1.1415439292561849
189	K	T	1.1408241280563516
243	S	G	1.140620072685588
514	G	D	1.1398118899443859
86	L	Q	1.1374043872834307
654	E	D	1.1358507805854001
513	V	W	1.1295758005680483
546	S	L	1.1292520919153486
600	G	M	1.127913437353505
173	Y	I	1.1264760200476227
408	T	D	1.1261954891786239
227	K	E	1.1237459036073059
229	K	G	1.1233513542818248
300	N	C	1.1230398113190696
239	C	Y	1.1167705443295293
369	L	R	1.1165762521614027
524	G	L	1.1147172583000808
85	H	C	1.1116854683533273
88	N	D	1.1107525698476919
234	N	G	1.1102230985480415
39	Y	F	1.105249040028089
229	K	A	1.103105936506898
71	T	Y	1.100974736038039
322	I	M	1.0947372943741909
184c	N	Q	1.093943469720709
244	T	A	1.090073006684594
333	V	L	1.0838667917263223
141	D	M	1.0820904534817828
273	R	A	1.0765304121369377
391	F	S	1.0758057566066992
74	C	R	1.0757525047313923
458	G	V	1.073360666086473
533	A	T	1.0726571861543057
700	A	R	1.0709036282696278
133	N	C	1.0703244394732763
136	N	L	1.0699147915582365
177	Y	C	1.0684213573855452
101	V	L	1.068419848705352
179	L	Q	1.06704093821869
85	H	Y	1.0668252236824014
179	L	I	1.0652750165328486
515	I	H	1.0591686261960103
85	H	A	1.0591329574404091
40	Y	H	1.0579974251040656
518	V	Y	1.057628421275772
86	L	V	1.0541915607971837
134	V	F	1.0525232298805554
410	S	A	1.0466632523033006
72	H	Q	1.0466466420657758
492	E	P	1.044652866916604
399	T	C	1.0429262478279628
322	I	Q	1.0419271699044506
291	P	A	1.03959023838559
516	G	D	1.0341027773566651
239	C	S	1.0316136105501517
85	H	P	1.0315346765698448
224	A	K	1.029553775275633
243	S	H	1.029526175510163
525	A	V	1.029508984482059
229	K	E	1.0282793668601928
609	P	Y	1.027920985475106
514	G	M	1.0271259909634851
629	L	N	1.0256090734356071
253	P	Q	1.0233795080728916
266	A	E	1.0232217968153448
389	G	C	1.0217836874649742
461	T	Y	1.0197209292255276
242	V	A	1.0190837882402761
204	A	R	1.0169507607404953
357	T	P	1.0151416189497222
188	N	V	1.013933220013761
91	E	T	1.0128527631074942
639	T	A	1.0120569425955004
393	S	G	1.0112395759711839
600	G	L	1.0105274944845262
358	I	R	1.010105935809587
82	Q	H	1.0094382170486134
512	A	F	1.0038418335445323
384	Y	S	1.0033841992819292
236	T	H	1.0026910290570321
273	R	Q	1.0022454644090728
474	D	S	1.002214864213209
237	G	K	1.0013873861860294
47	D	G	1.0011089987640118
357	T	K	0.9995278266348392
629	L	Q	0.9982967608882671
467	T	P	0.9980348865642282
512	A	C	0.9975646210500789
305	K	N	0.9952573828421959
602	L	P	0.9951553009268755
659	D	Y	0.9950865915386641
241	S	G	0.9946896898892901
512	A	I	0.9931934268084589
276	N	F	0.9931712961028768
243	S	V	0.9917593724123945
85	H	I	0.9906269244284025
602	L	A	0.9895549333156695
241	S	D	0.987997340775867
135	T	M	0.983710709049166
494	L	T	0.9829646964304951
280	N	D	0.981925699508462
556	L	P	0.9768703822520937
117	K	I	0.9734931196357932
481	S	R	0.9721815378275005
392	N	C	0.9715697144323283
513	V	I	0.968431733441171
186	N	V	0.9678801387451872
518	V	M	0.967193884765348
699	F	E	0.9657027550151732
80	N	V	0.9634129332021303
361	F	I	0.9628320095766519
336	A	F	0.961148142989865
234	N	I	0.9606702821145223
83	E	H	0.9601053799235477
35	W	Y	0.9594437474539474
130	Q	M	0.9580228132246065
522	F	S	0.9575315584178692
87	E	F	0.9574071305636574
540	Q	L	0.9560745216365513
209	S	A	0.9555156802770816
521	G	T	0.9550496031696166
649	S	Q	0.9549923272474452
607	N	D	0.9548723850541397
603	I	V	0.9548596972497898
135	T	P	0.9545844210774612
395	W	I	0.9518975204243894
68	V	K	0.9515306077960093
617	R	L	0.9500827754109097
588	R	G	0.9471184171141012
687	M	V	0.9464657817625866
39	Y	W	0.9457942934370959
701	V	S	0.9448288130274383
32	E	A	0.943616111635917
348	Q	S	0.9416633275710549
668	S	W	0.9408732324220433
75	V	R	0.9399973361704304
227	K	V	0.9357481734550207
396	I	V	0.9347296805247677
346	V	F	0.9330881250655703
581	L	Y	0.9325720831033764
218	C	S	0.9306147820507057
512	A	N	0.92863777652722
152	G	R	0.9270618143563419
225	I	L	0.9243422366738936
59	K	Q	0.9239914507599702
49	E	R	0.920618400202577
339	N	M	0.9182053199466531
151	R	K	0.9177307335513816
637	N	R	0.9164735392800939
36	V	T	0.9158739422766721
167	D	A	0.9143100255089844
97	K	E	0.9122533421430967
625	N	Y	0.9091041924010279
415	T	G	0.9061097630567052
483	L	A	0.9045839437164447
371	V	N	0.9004406779134666
231	K	R	0.8998602853238314
305	K	S	0.8995334071327679
397	S	L	0.8983295771602531
512	A	W	0.8976783063546518
673	F	I	0.8976659295273401
500	R	S	0.8975257735733551
588	R	M	0.8974321508478765
86	L	T	0.8974264377324546
629	L	V	0.8973150219158191
670	W	L	0.8968643837799107
265	L	V	0.8966343509484977
667	A	K	0.8954541332263093
676	S	P	0.8941766605996035
229	K	V	0.8941667296271381
639	T	K	0.8939397223420131
568	L	P	0.8933531909172256
234	N	S	0.8928164245656363
698	V	T	0.8915366928966852
227	K	H	0.8908910386292317
337	T	F	0.8901234085837441
243	S	T	0.889344180727601
641	I	P	0.8881415978262835
493	P	N	0.8863519300817362
411	N	Q	0.8863447666589908
293	Q	K	0.8853923881242645
99	N	R	0.8845616795077367
518	V	Q	0.884061567694557
234	N	D	0.8816032543720421
514	G	Q	0.8815774444807993
378	C	G	0.8812714100085091
292	V	G	0.8794470474279539
184c	N	S	0.8788275722299244
658	Q	S	0.8788173480350382
267	E	I	0.878135747041693
161	M	A	0.877977942547664
382	F	V	0.8776732376548994
231	K	E	0.8770553409779598
671	N	A	0.8765829050116352
434	M	S	0.8759691979333454
176	F	C	0.8749597216062941
83	E	N	0.8738035054659089
514	G	F	0.8727787254723727
586	Y	F	0.8720714270810516
227	K	N	0.8704319696132332
359	I	Y	0.868811350638089
571	W	R	0.8683875297853143
489	V	T	0.8679817327422091
33	N	F	0.867400105743937
184f	N	A	0.8671341034946547
177	Y	W	0.8664380258412847
138	I	R	0.8662818668442165
448	N	Y	0.8660951988684459
503	R	G	0.8659105470382348
236	T	R	0.8658382411282409
349	L	I	0.8653754894385028
326	I	P	0.8650803937496424
177	Y	F	0.8649748206381227
139	T	R	0.8646901785343883
636	S	A	0.8635587951178271
596	W	L	0.8626848087985708
624	D	E	0.8603628491626594
664	D	S	0.8591652461623612
600	G	F	0.8582802296039289
629	L	T	0.8570373897041852
407	S	M	0.8567175446694648
75	V	L	0.8556955405690384
330	H	E	0.8555991895608547
96	W	L	0.8536125266407856
83	E	A	0.8523164853831224
103	Q	D	0.8512753050146553
463	S	M	0.8511947009649419
625	N	L	0.8488411041121456
516	G	T	0.8486780483085627
467	T	F	0.8483567862877757
462	N	I	0.8460962620121073
340	E	G	0.8456470362032031
166	R	W	0.8455732608695341
103	Q	H	0.8452103309743749
347	K	C	0.8449280282666537
360	R	F	0.8439909614136792
252	K	E	0.8424964094579588
107	D	S	0.8421362351990092
193	L	T	0.841782486550243
581	L	C	0.8408709162398982
681	Y	H	0.8406699837705695
244	T	W	0.8395564189046991
38	V	T	0.8392457608770254
275	E	Y	0.8391712327706721
660	L	S	0.8390828604774623
48	A	M	0.8389736431092193
412	D	N	0.8389069405577658
141	D	I	0.8385021377116958
291	P	L	0.8374869301443674
394	T	I	0.8373297758617815
412	D	C	0.837255129153692
284	I	V	0.8365702600726057
265	L	I	0.8346244828306006
453	I	Q	0.8342222900059619
134	V	R	0.8338589544687351
612	S	H	0.8338194575760565
241	S	I	0.8324003818982091
514	G	H	0.8322206796592547
336	A	S	0.8313579536830111
279	N	K	0.8299767685577965
227	K	L	0.8294285056540922
271	M	Q	0.8289045278744466
229	K	D	0.8274627171203587
557	R	A	0.8262983590952852
246	Q	K	0.8236115675741431
357	T	S	0.8233008387102915
356	N	F	0.8224523597281177
89	V	T	0.8222716941431925
216	H	Q	0.8211788759378656
220	P	G	0.8210746972039061
510	K	S	0.820630382538875
484	Y	F	0.8204109246745641
295	N	L	0.8178218399962363
405	S	H	0.8168606729984897
243	S	F	0.8161205064401627
152	G	P	0.8156445544119234
343	G	M	0.8140561750337636
373	T	N	0.8138465351239716
518	V	I	0.8138166055257509
269	E	Q	0.8121625451083286
94	N	T	0.8118087839418817
505	V	L	0.8104731206974878
324	G	E	0.8103333838419602
492	E	H	0.809437066252988
241	S	F	0.8080454541300714
320	G	P	0.8066941816278311
84	I	C	0.8064449956844695
234	N	W	0.8062228972732705
504	R	W	0.8055301661682716
217	Y	R	0.8045534409270482
125	L	I	0.8042961000628931
351	K	G	0.8023817751729585
349	L	V	0.8023243153038433
369	L	H	0.8010897220485405
253	P	K	0.8005057558636066
627	T	N	0.7997096451022412
542	R	L	0.7973566379346249
496	V	M	0.7972924203092763
135	T	S	0.7961299669884191
491	I	G	0.7956054011237921
337	T	R	0.7954468393080215
85	H	E	0.7949069201540647
229	K	Q	0.7945147192155432
480	R	Y	0.7940236096366569
411	N	A	0.7934570861242698
186	N	R	0.7931479297061331
169	K	N	0.7929766783503411
335	K	Y	0.7928333708008067
320	G	F	0.7927858047997732
275	E	M	0.7926165305749312
379	G	F	0.7922058784512034
179	L	T	0.7912837099746585
524	G	N	0.7911487739678268
629	L	Y	0.7908559326668854
351	K	P	0.7905939969983773
91	E	D	0.7904779193774669
469	R	G	0.7896768325811507
236	T	A	0.7895448076461262
332	N	G	0.7884593765149155
516	G	S	0.7877273505091062
319	T	R	0.7873318104232643
347	K	E	0.7862518831327172
526	A	E	0.7860676810058367
684	I	K	0.785738699847369
46	K	Y	0.7854750833426476
331	C	Q	0.7845705442808115
544	L	S	0.7843972894580402
463	S	Y	0.7827662651440286
243	S	N	0.7827653015144889
371	V	G	0.7826140560769184
554	N	D	0.782012466875039
289	N	G	0.7813035487967988
113	D	F	0.781234400018853
434	M	I	0.7801925012406281
121	K	Q	0.7796888386240475
275	E	G	0.778835296649651
122	L	V	0.7779194551059709
339	N	I	0.7779153646661345
227	K	C	0.7772383250358371
134	V	I	0.776887418911257
542	R	I	0.7767509732587581
188	N	E	0.7758428615897703
267	E	W	0.7755783418137356
623	W	C	0.7742817500235329
82	Q	A	0.774155127474055
343	G	N	0.7735502110879912
531	G	V	0.7727083089478588
640	Q	S	0.7725894463611461
518	V	S	0.7708388181791286
130	Q	Y	0.770181803784228
293	Q	L	0.7676196817022016
48	A	I	0.7674844637336675
386	N	F	0.767131166624363
638	Y	L	0.7671009964177711
157	C	S	0.7667879135616069
688	I	P	0.7665500508282018
500	R	M	0.7664041268209529
639	T	Y	0.764708124811146
625	N	D	0.764175651923133
97	K	D	0.7638087149702171
80	N	W	0.7635851925590441
253	P	W	0.7635026080512314
506	V	E	0.7630611196260375
697	I	P	0.7617072845576098
360	R	N	0.7595754789762503
604	C	R	0.7593865044845067
223	F	M	0.75795599573318
536	T	A	0.7571339532633257
319	T	P	0.7550692880043629
224	A	H	0.7549774337550446
494	L	P	0.753945063027362
672	W	G	0.7526353936326386
48	A	W	0.7522746393437356
107	D	T	0.752079034388361
313	P	T	0.7520540193745202
137	N	I	0.7515378690384318
655	K	L	0.750481099681336
461	T	Q	0.7502917646852738
337	T	H	0.7500981804574873
236	T	I	0.7500656321956736
294	I	T	0.7495278965617446
165	L	P	0.7488782492574511
281	A	C	0.7488633363564646
320	G	R	0.7479224279099614
393	S	P	0.7475952982985163
131	C	S	0.7462383607220411
163	T	V	0.7457617437915113
696	R	W	0.7456390635912189
653	Q	A	0.7441757616267365
428	Q	R	0.7440847835030673
505	V	C	0.7440265642114268
346	V	E	0.7431495689430891
527	G	S	0.7431435094665871
101	V	C	0.743008264260361
86	L	A	0.7429446496837367
383	F	R	0.742843167510233
264	S	K	0.7421850856508627
108	I	P	0.7419389946932083
620	S	D	0.7413587847109917
231	K	M	0.7398709466382396
164	E	V	0.7398590977175259
283	N	T	0.7398004009041533
525	A	S	0.7397226949056086
384	Y	T	0.7396752927276012
139	T	S	0.7395569427647464
38	V	E	0.7395112368811674
526	A	C	0.7394540131695918
477	D	T	0.7388232776559276
402	V	E	0.7385148212280199
204	A	E	0.7360805652310732
364	S	G	0.7351623125308864
172	V	D	0.7346986045800693
521	G	A	0.7345862907766663
165	L	Q	0.7342749159212985
699	F	A	0.734260832145709
154	L	R	0.7340506353708095
652	Q	K	0.7339707679011838
100	M	F	0.7336842637184785
121	K	M	0.7336088046137184
656	N	K	0.733547409801219
377	N	T	0.7321202314380554
457	D	G	0.731886110587394
32	E	Y	0.7318562438438192
600	G	Q	0.7314501803916484
155	K	R	0.7310398517094554
521	G	N	0.7309133899516876
650	Q	M	0.7307438154655086
644	G	C	0.7306445625393474
643	Y	R	0.7289278013267286
315	Q	L	0.7288234831274819
217	Y	S	0.7286270846118372
535	M	W	0.7284185511654092
184g	R	H	0.7277765599953274
691	G	Q	0.7275206248876288
44	V	N	0.7262648992686509
650	Q	A	0.7253745062678826
332	N	D	0.7237281024421949
528	S	F	0.7228467323031968
134	V	D	0.7226339876695056
540	Q	R	0.7222103152112798
536	T	S	0.7216921114852015
185	N	V	0.7213715879867129
122	L	R	0.7208312354414894
404	G	Q	0.7206738211363604
545	L	F	0.7205326971241365
643	Y	F	0.7200527817927183
564	H	A	0.7197686262298195
321	D	Y	0.7193629222555472
437	P	T	0.7192009731168156
641	I	F	0.7190396611985431
671	N	Q	0.7190097708014391
314	G	T	0.7177567600623747
350	R	I	0.7174023977924989
513	V	Y	0.717252943217722
524	G	W	0.7172517926522581
229	K	F	0.7166779948313247
677	N	Y	0.7163559358836165
577	Q	K	0.7157623025794886
411	N	V	0.7157106421063101
186	N	P	0.7155635906893453
539	V	G	0.7154307785733396
677	N	C	0.7142284058927788
522	F	T	0.7140924192186099
563	Q	T	0.7135374011813316
619	L	S	0.7134899088398085
72	H	A	0.713371872678676
505	V	W	0.7131708569387513
609	P	L	0.7129455292050306
130	Q	F	0.7119758067923077
604	C	S	0.7119232255543465
495	G	L	0.7118898442575086
286	V	L	0.7117695426400754
89	V	A	0.7108207873882635
354	G	K	0.7105524544501042
87	E	W	0.7092063241462345
337	T	V	0.7091806783812707
373	T	E	0.7089104296692208
142	M	F	0.7082753909601148
50	T	H	0.7078005367369042
378	C	Y	0.7076143347655656
342	L	F	0.7072824824019055
281	A	S	0.7071202298273918
72	H	C	0.7064906472005514
405	S	E	0.7063815975754858
593	L	P	0.7063726254475422
665	K	L	0.7062987932711963
518	V	A	0.7062922829616863
521	G	P	0.7049448210794095
34	L	F	0.7031315361575927
140	D	K	0.7016523037719593
654	E	K	0.7015613978214118
40	Y	Q	0.7014717606782247
196	C	G	0.7010390674686862
396	I	T	0.700770347101336
690	G	N	0.7001907567905022
413	S	H	0.6999791411852384
273	R	K	0.6984614547315954
388	S	H	0.6983648034201877
129	L	I	0.6980000230393903
321	D	F	0.69791558932388
561	A	E	0.6978730593235203
512	A	H	0.6975736372201033
629	L	S	0.6973919758916391
499	T	C	0.6956801141421787
684	I	V	0.6955235953652567
59	K	Y	0.6937091927056713
616	N	E	0.6936738180291423
162	T	K	0.690709695901186
417	P	K	0.6905784139546831
600	G	N	0.6904443398592233
570	V	G	0.6901743857024618
239	C	E	0.6897749758201137
349	L	Y	0.6895051422860382
294	I	R	0.6893353971276625
370	E	L	0.6892273590115899
309	I	P	0.6887994131849556
47	D	R	0.6885146166361904
326	I	F	0.6879486111239386
130	Q	I	0.686854093214871
694	G	Y	0.6867951996209611
460	S	W	0.6867267493448557
82	Q	C	0.6864211876037074
481	S	H	0.6863204267576135
106	T	K	0.6857779170049783
476	R	E	0.6854722846233836
153	E	V	0.6853469512035653
241	S	N	0.6840114824299187
232	K	C	0.6838136062841211
199	S	T	0.6836168537793004
46	K	M	0.6832798897895463
47	D	L	0.6823115575136253
327	R	Q	0.6815004554265327
490	K	H	0.6810884157809698
663	L	S	0.6809689385011183
653	Q	V	0.6801971151926355
408	T	Q	0.6799811610076294
339	N	P	0.6794909963607612
401	S	F	0.6789007696836161
460	S	I	0.6784977413654869
261	L	A	0.6784740454889387
531	G	C	0.6780832419640952
270	V	A	0.6778922776643148
610	W	L	0.6766348285451598
307	I	M	0.6763737571277815
287	Q	F	0.6760616412507244
396	I	M	0.675835176785052
691	G	H	0.6754539816379084
154	L	T	0.6753735280439896
614	W	R	0.6751721363473315
187	S	C	0.6748287089301994
287	Q	V	0.6747321865244694
111	L	P	0.6743455625610013
156	N	W	0.6742600918328857
588	R	V	0.674125243813277
520	L	G	0.6740291879653084
659	D	A	0.6739409784884983
528	S	W	0.6730667842165424
60	A	E	0.6722173101597704
520	L	I	0.6720476678544717
184d	Q	I	0.671899204554858
566	L	S	0.6713070085423581
88	N	C	0.6713019277217084
229	K	Y	0.6710994873920914
652	Q	W	0.6710210507360691
392	N	L	0.6706180243028385
290	T	G	0.6704539539442114
97	K	L	0.669354418730605
188	N	A	0.6689568330742353
47	D	K	0.6684899385797336
675	I	A	0.6673031130703629
403	Q	G	0.6670070906128804
178	R	H	0.6669544605502544
514	G	E	0.6665951487940428
372	T	Q	0.665642405307135
662	A	E	0.664800976802756
244	T	G	0.6646463068544628
344	K	M	0.6632746422483307
648	E	G	0.6621665316249775
45	W	R	0.662133189433411
448	N	V	0.6620120997842792
83	E	V	0.661404776455391
126	C	V	0.6611969046115589
142	M	W	0.6611863454527652
371	V	F	0.6606967342030179
489	V	Y	0.6605991242363678
508	R	N	0.6605655150251161
176	F	I	0.6604824658317088
346	V	C	0.6598068672687418
321	D	K	0.6596803768083528
532	A	V	0.659669712151171
392	N	H	0.6596335678591216
84	I	M	0.6592843521669116
232	K	Y	0.6589534564422393
581	L	M	0.6586358400923499
249	H	K	0.6583208732294166
461	T	V	0.6582831233190584
516	G	C	0.6580084803448244
76	P	T	0.6565763824968138
295	N	S	0.6561516661502027
411	N	E	0.6558019291560249
242	V	F	0.6555506903755391
211	E	V	0.6553289600318749
368	D	G	0.6551477169879104
550	Q	T	0.6550108077719851
340	E	F	0.654585015671846
337	T	S	0.6539363735037901
527	G	A	0.6538289574255498
130	Q	K	0.6533172259933562
63	T	M	0.6533020160888829
690	G	S	0.6523380469831307
442	V	Q	0.6522260049152093
460	S	K	0.6521689941695279
451	G	V	0.6519113048470087
335	K	S	0.6517464145490817
688	I	G	0.6512657614686292
184h	S	Q	0.6500112057862749
80	N	Y	0.6498032343580453
518	V	N	0.6479188267899849
209	S	P	0.6465968725955975
218	C	Y	0.6457271503319193
521	G	V	0.6453635807963758
392	N	R	0.6453117093941094
55	A	S	0.6451348993140594
249	H	L	0.6442817969884819
464	T	P	0.6436506837391689
308	R	Q	0.6434078485679342
524	G	Y	0.6433987571208524
508	R	G	0.6432295058665799
232	K	D	0.6420481272327481
83	E	D	0.640862489609509
315	Q	N	0.6405564743526854
152	G	L	0.6399632834158439
33	N	G	0.6386010487859206
72	H	K	0.6378955676806185
562	Q	R	0.6373753703067188
35	W	L	0.6371912466942486
231	K	T	0.6361311025941463
124	P	T	0.6357882349945878
330	H	D	0.6352320377355187
639	T	G	0.6342626207168697
547	G	S	0.634108847888678
224	A	W	0.6331149356966186
99	N	T	0.6322101791848694
239	C	V	0.6320363671101455
284	I	W	0.631873350145125
306	S	N	0.6318722331463518
228	C	H	0.6316324276967263
368	D	A	0.6316180323977454
398	N	V	0.6313571770871615
115	S	D	0.6311111499517618
276	N	L	0.6309229214046765
404	G	T	0.6308046520492008
442	V	C	0.6306985253584609
453	I	K	0.6306921678275835
31	A	D	0.630410086998063
385	C	F	0.6303812172063279
344	K	W	0.6290953900412756
637	N	A	0.629084915906433
173	Y	C	0.6287679437942526
243	S	Y	0.6283226688979033
482	E	K	0.6283163267038544
42	V	I	0.6280064289236351
514	G	A	0.6278534518940041
153	E	K	0.6275788868518701
590	Q	P	0.6275042696464013
384	Y	M	0.627439983551902
137	N	F	0.6274331388786494
289	N	F	0.6270793558596084
165	L	V	0.6267642969311797
223	F	A	0.6266782417185367
671	N	K	0.6266704918496984
133	N	K	0.6263823880997558
91	E	C	0.6256847732377618
164	E	Q	0.6252638639379375
346	V	I	0.6251606378649364
361	F	V	0.62465705222574
196	C	R	0.6245934725244492
72	H	N	0.6237357419838985
151	R	F	0.6235544449338049
484	Y	H	0.6232566125735767
504	R	N	0.6227721109584619
651	N	T	0.6218950820972569
59	K	P	0.6211336039236517
285	L	Y	0.6210782873880613
224	A	N	0.6200010156968703
89	V	E	0.6193850900021116
330	H	Q	0.6191893578618062
612	S	Q	0.6186479886220153
354	G	D	0.6186070249305764
96	W	A	0.6181759958086372
330	H	L	0.6178214426311137
175	L	G	0.6173922748169299
500	R	V	0.6173673997354517
42	V	A	0.6161798476470164
184e	G	H	0.6160783454223477
168	K	R	0.6152228647734721
191	Y	R	0.6151477971835659
398	N	D	0.614771660971759
236	T	W	0.6146126436169602
47	D	I	0.6145864941047291
209	S	E	0.6144479321057665
135	T	R	0.6144213610660404
542	R	K	0.6140253461110345
351	K	S	0.6134927626323771
190	E	R	0.6130188254569591
492	E	G	0.61217668003988
334	S	C	0.6120846378464155
296	C	G	0.6118303163307252
342	L	V	0.6118038679614075
319	T	D	0.6116717536491255
39	Y	T	0.6114254638366198
432	Q	K	0.6113361164300546
111	L	N	0.6108219632340162
276	N	E	0.6104039229213882
695	L	R	0.6102306479822076
672	W	D	0.6088529271921181
358	I	Y	0.6086210417257316
501	A	E	0.6079214001149743
52	L	Q	0.6077487508575017
505	V	A	0.6075389785586354
702	L	I	0.607004354370665
285	L	Q	0.6055256296402683
629	L	F	0.6043637924652037
601	K	I	0.6042306789880217
650	Q	E	0.6034670340680884
665	K	R	0.6028450267132127
664	D	I	0.6025903295395271
647	E	L	0.6023475880514553
457	D	I	0.6020993900895288
479	W	H	0.6017181881293968
102	E	A	0.600950379058594
246	Q	I	0.6005465399137884
49	E	G	0.6001362101818849
136	N	P	0.6000266480196061
702	L	R	0.5985154088567107
83	E	T	0.5982174978105662
661	L	W	0.5980782896552355
316	A	G	0.5979892637020439
184g	R	T	0.5979864978131646
409	G	M	0.5978106563691103
627	T	A	0.5971780016907198
266	A	L	0.59701460670185
369	L	N	0.5964719376808589
575	Q	S	0.5963590857152451
600	G	W	0.5961756191210322
512	A	D	0.5957140869577517
133	N	G	0.5953659842577312
390	L	P	0.5952350276966206
599	S	F	0.5950526673270543
220	P	I	0.5947124863248964
137	N	H	0.594206910809284
116	L	E	0.5938920355450521
630	Q	I	0.5934283662320856
95	M	G	0.5930638604818533
168	K	E	0.5925746535301795
535	M	K	0.5923100160457377
237	G	A	0.5915920140042279
343	G	I	0.5911302701058415
90	T	F	0.5906758057226692
628	W	R	0.590557435023021
664	D	W	0.5903826096674452
436	A	R	0.5900399548467063
293	Q	D	0.5899705692973838
360	R	H	0.5893324468734539
577	Q	E	0.5889830237265504
596	W	R	0.5883406368814009
241	S	E	0.5881949852273288
682	I	V	0.5881610937723067
187	S	I	0.5880483507568759
184e	G	F	0.588031035460343
510	K	Q	0.5880219833979844
519	F	G	0.5875042251775924
185	N	L	0.5873670206325127
259	L	R	0.5873094774838636
702	L	C	0.5865577164604628
183	Q	T	0.5864897570231445
304	R	Y	0.5856643232967293
172	V	A	0.5855474063499426
358	I	N	0.5843918762304303
653	Q	L	0.5839571610630709
348	Q	L	0.5839069102893012
518	V	T	0.5832607358570719
137	N	K	0.5830996339170139
184	I	N	0.5830325922685318
455	T	E	0.5830014156207193
334	S	H	0.5823629095958861
402	V	R	0.5822047228154428
417	P	Q	0.5821363552473844
505	V	F	0.5816536540218544
201	I	T	0.580868090760997
525	A	I	0.580841058029645
575	Q	R	0.5801895267126367
265	L	W	0.5801498785804753
93	F	L	0.5801152943639101
348	Q	Y	0.5797726384858565
422	Q	A	0.579664195088004
321	D	Q	0.5791864386050547
602	L	R	0.5791064831298774
412	D	S	0.5779348170857679
664	D	C	0.5779147650116137
394	T	N	0.5778877480947244
132	T	A	0.5768909790892526
322	I	R	0.5768368316986813
599	S	V	0.5766150596963142
596	W	Y	0.5760794806424585
685	F	W	0.5756703242835682
138	I	F	0.5752358269380757
625	N	I	0.5749418634057699
51	T	C	0.5749205021154031
390	L	N	0.574233215058589
391	F	P	0.5738517964977092
606	T	I	0.5738495009092877
539	V	I	0.5738107091213719
268	E	P	0.5737784374157151
226	L	R	0.5728212206398062
37	T	L	0.571900517224625
670	W	S	0.5712991691761503
357	T	M	0.5693038545415497
242	V	P	0.569175920704639
91	E	N	0.569107705233214
249	H	F	0.5689908927368637
122	L	Y	0.5689049524442814
43	P	Q	0.5688748422503026
233	F	V	0.5688566029596611
292	V	T	0.5688318994421646
116	L	G	0.5687338417201548
102	E	G	0.5685838162971182
111	L	W	0.5683775144407596
209	S	C	0.5682860475706376
184h	S	P	0.5682208389963112
38	V	A	0.5681524936324015
104	M	S	0.5680374712378017
197	N	R	0.5678985461727671
201	I	E	0.5678410911054053
323	I	M	0.5675534603761412
86	L	E	0.5674499770243445
542	R	S	0.5671877637515887
357	T	F	0.566719575609872
166	R	F	0.5652767251411241
171	K	N	0.5647682099507472
552	Q	P	0.56392345655861
214	P	Y	0.563648945267648
363	N	C	0.563220880420525
129	L	F	0.5629390496240851
230	D	E	0.5626067244112469
528	S	G	0.5624688399317577
63	T	Q	0.5624214617916627
524	G	R	0.5623030493142508
467	T	V	0.5619178814165676
674	D	V	0.5618497788182144
281	A	M	0.5613114106308532
354	G	E	0.5611159954004558
607	N	K	0.5607188543615085
184	I	Q	0.5606124819463899
335	K	H	0.5604697458487297
184e	G	S	0.5602100781992353
89	V	C	0.559864645717417
588	R	I	0.558146155816893
126	C	I	0.5579714658778456
690	G	W	0.5576539739089135
655	K	S	0.5576113300352363
297	T	Q	0.5575356772433985
477	D	Y	0.5570870378898365
183	Q	A	0.556835205799634
218	C	V	0.5565293402771593
131	C	M	0.5557899842260882
128	T	H	0.5557883448806941
382	F	L	0.555758133422356
154	L	C	0.5557013459380908
184h	S	T	0.5556084720743676
164	E	T	0.5555649455061135
131	C	R	0.555182581397828
240	P	N	0.5547610065107881
388	S	P	0.5546708109035066
535	M	I	0.554215074144611
450	T	R	0.553791738411011
593	L	V	0.5529816365708425
580	V	D	0.5527289684406245
227	K	S	0.5523992132114429
480	R	H	0.5521104857032345
263	G	F	0.5503255407034239
317a	Y	V	0.5501938325091544
386	N	Q	0.5501442046517201
392	N	M	0.5496157676625391
671	N	D	0.5494525401871723
258	Q	R	0.5492725960925787
582	A	Y	0.5491134689733579
238	P	G	0.5486883381940689
412	D	F	0.548141178417554
113	D	N	0.5473917246443047
278	T	C	0.5469215453032744
221	A	L	0.5467513622073399
175	L	N	0.5466985463027331
236	T	S	0.5461043090896258
93	F	S	0.5455508920441038
126	C	N	0.5450327528188632
168	K	S	0.5447635734976842
109	I	K	0.5444518699836625
241	S	M	0.5443879552110393
187	S	M	0.5441378681891084
691	G	D	0.54410049536793
182	V	N	0.5436046829323571
63	T	C	0.5435752504600125
507	G	D	0.5434857903868914
557	R	Q	0.5434047433517285
424	I	C	0.5427134474761012
527	G	T	0.5426125003154169
184d	Q	C	0.5422187409096724
492	E	W	0.5421500819031286
34	L	M	0.541936212742776
515	I	V	0.5417120341497884
287	Q	A	0.5409626652776611
492	E	K	0.5409093916254641
227	K	Q	0.5408742242627896
153	E	Q	0.5405926887883772
685	F	S	0.5401038990280833
230	D	K	0.5400652308423904
383	F	C	0.5396611608280838
290	T	E	0.5394711194968568
398	N	E	0.539130134397772
254	V	T	0.5383066088301507
413	S	G	0.5381615857596409
608	V	H	0.5377491024495848
193	L	F	0.537558908585401
521	G	F	0.5372456537787642
244	T	E	0.5364142386647626
579	R	M	0.5362992166874114
591	Q	H	0.536187166910246
37	T	H	0.5356347310302939
47	D	Q	0.5353556786234219
53	F	S	0.535323856859157
276	N	T	0.5351933614020117
563	Q	P	0.535108409786667
637	N	H	0.5349667779496582
249	H	Y	0.5347474730139793
412	D	T	0.5347250328886854
169	K	D	0.5346826832699686
432	Q	I	0.5342549891081531
245	V	I	0.5341305157846321
174	S	P	0.5337943326507126
126	C	R	0.5334675781447309
386	N	I	0.5333900256733358
577	Q	S	0.5332076109538478
75	V	Y	0.533009940983813
91	E	G	0.5312543993579393
163	T	H	0.5309596543072609
137	N	G	0.5307139182185798
661	L	M	0.5305548161075853
352	H	P	0.5305130235512138
663	L	M	0.5304942729930785
62	E	H	0.5304491504100486
455	T	P	0.5304358544330624
542	R	A	0.5301283611968446
413	S	C	0.5297501906798214
254	V	Q	0.5297413137408521
448	N	M	0.5295047955139188
465	T	P	0.5294739118845941
332	N	L	0.5293551049157278
252	K	R	0.5290252234544677
492	E	A	0.5286249270753477
80	N	E	0.5283464666332797
309	I	W	0.5283026735630996
85	H	T	0.5280203602932554
622	I	Q	0.527642958947281
357	T	R	0.527530484099383
309	I	L	0.5274328420087706
392	N	A	0.5272478017440045
184e	G	D	0.5270935492562964
691	G	F	0.526890611684284
647	E	K	0.5263430400907387
351	K	M	0.5261183650057061
306	S	F	0.5258142899485099
286	V	I	0.5256033993449082
517	A	L	0.5254062883130848
320	G	H	0.5242313834248268
136	N	Y	0.5242180851178273
83	E	P	0.5238671683312415
350	R	A	0.5235913641875948
669	L	Q	0.5231167353655046
683	K	P	0.5226895582588996
165	L	I	0.5224092342771098
92	E	S	0.5222490126872547
491	I	T	0.5221160348284237
244	T	K	0.5220677092529606
481	S	T	0.5215769401126221
185	N	E	0.5215379490482427
178	R	V	0.5215340463638991
60	A	F	0.5211246104123869
649	S	V	0.5205721249143143
394	T	F	0.5205254368252524
335	K	P	0.5203745564093184
240	P	F	0.5203462633987183
478	N	D	0.5193126412503881
578	A	N	0.5193049737935941
523	L	F	0.5190211538207506
170	Q	H	0.5189798957490135
434	M	V	0.5187026115312018
122	L	S	0.5186621259937113
407	S	N	0.5185995569304428
84	I	K	0.5182921694038234
626	M	Y	0.5181308001818732
128	T	A	0.5178968664928729
664	D	T	0.5177145579131899
637	N	V	0.517382917344867
359	I	T	0.5173306829770791
664	D	H	0.5171058850718024
509	E	T	0.5166014775816001
331	C	P	0.5163826949020451
236	T	K	0.5162966521593351
412	D	R	0.5162228535861324
446	V	M	0.5156764739202196
184	I	A	0.515647998007427
279	N	R	0.5155948788186429
543	N	R	0.515495090720438
432	Q	M	0.5148764108198188
307	I	V	0.5144123710515681
191	Y	H	0.5143595950906912
557	R	W	0.5141243962954947
607	N	F	0.5140805594380455
62	E	M	0.513899329441486
141	D	Q	0.5131821991013847
307	I	W	0.5121150682345104
241	S	V	0.5120077088056522
364	S	T	0.511640143202337
565	L	P	0.5115931077419343
195	N	R	0.5115505324304988
698	V	S	0.5113992708721917
653	Q	C	0.5112056889213985
649	S	Y	0.511037385027178
664	D	K	0.5109795051344102
414	I	Y	0.5099537295710321
405	S	C	0.5098581946509235
599	S	G	0.5098185572956083
344	K	C	0.5097417208878418
121	K	H	0.5092325301050225
98	N	G	0.5089454526627859
41	G	E	0.5088725535348627
261	L	V	0.5084791170291313
347	K	P	0.5083880055920615
686	I	K	0.5083011943112766
330	H	M	0.5079470818803689
657	E	K	0.5078556392711819
185	N	F	0.5071418410772689
31	A	K	0.5061525943801327
184d	Q	E	0.506070828255221
31	A	F	0.5057767377070198
320	G	E	0.5056032437326197
354	G	C	0.5055742250237241
394	T	C	0.5051664433617227
543	N	M	0.5048546084396626
462	N	R	0.5046576566862833
413	S	L	0.5045329585677762
192	R	S	0.5042799014743362
502	K	C	0.5041422159353931
358	I	T	0.5038597668919418
117	K	R	0.5037716179028241
638	Y	V	0.5031334434248758
317	F	M	0.5019604364154627
367	G	V	0.5012127502810402
373	T	C	0.5011871117594381
236	T	E	0.5008263001617478
226	L	P	0.5007976600793047
330	H	V	0.5007626798259592
546	S	R	0.5006668828276513
35	W	S	0.5002710679600589
349	L	T	0.5002493306591734
246	Q	F	0.5002072287325723
96	W	K	0.5001701114296151
43	P	C	0.5001230803753351
355	N	M	0.500115264613565
368	D	S	0.5001008294808484
338	W	K	0.500093596134198
235	G	I	0.5000729095980718
272	I	G	0.5000249509624637
299	P	A	0.4999247712938592
262	N	Q	0.4999143461773287
510	K	H	0.49933778099257853
352	H	N	0.49933328695125423
55	A	C	0.49907073821677045
356	N	Y	0.4987680164710489
483	L	I	0.49842332881657464
43	P	L	0.49827406320736506
573	I	K	0.4980703462984829
560	E	H	0.4975343700459602
545	L	G	0.4974395242614638
369	L	E	0.497326962424878
95	M	I	0.49715377784493386
232	K	I	0.4969703752495098
90	T	D	0.4968738389474882
527	G	W	0.4968214581091361
465	T	M	0.49649139081069693
49	E	N	0.4960320351143026
375	S	N	0.4960153168941105
435	Y	N	0.4957858844021218
622	I	N	0.495764767027396
651	N	Q	0.49568923472407544
267	E	F	0.4955605135114821
479	W	M	0.49536104523949476
189	K	R	0.49513462530200547
660	L	F	0.49507639152393634
630	Q	F	0.49484164661101937
312	G	E	0.49466685421434364
468	F	S	0.49456298495687073
389	G	T	0.4938306478976126
214	P	F	0.49371345002070194
670	W	E	0.4936968057933253
469	R	T	0.4936490540379691
290	T	Q	0.4936398997623439
268	E	I	0.4931371865083698
455	T	A	0.4930041332039786
267	E	Y	0.4928678093871727
399	T	W	0.4926239888582039
98	N	H	0.49241104411605147
187	S	V	0.49200067142193254
195	N	V	0.49121973412223024
407	S	T	0.49109510663751327
39	Y	R	0.4908891866867516
316	A	V	0.4908820427883637
520	L	V	0.49081128056414125
628	W	F	0.49080471382006274
221	A	F	0.490784741026136
454	L	S	0.4906382549554157
347	K	Q	0.4898195066093946
184c	N	G	0.4895397727647451
197	N	S	0.48920819841955654
491	I	H	0.4891041146632736
184e	G	Y	0.48896324761842314
196	C	N	0.488902759240816
218	C	A	0.48882867550503717
339	N	F	0.48873457962724187
259	L	Q	0.4886442339894036
204	A	K	0.48811298712259527
587	L	H	0.4880350292549862
67	N	I	0.4877562353505377
686	I	P	0.48750735509797277
214	P	W	0.4873627477663156
82	Q	V	0.4870318182213504
270	V	F	0.486771838534938
455	T	Q	0.4866102525210101
240	P	S	0.48652725559592147
412	D	K	0.4864750001361884
276	N	R	0.4862651789571304
336	A	K	0.4860187046866367
136	N	W	0.4858390757067545
51	T	G	0.48555602741740844
632	D	F	0.4855290444122363
412	D	W	0.4853280199534816
116	L	R	0.4847945884743036
422	Q	V	0.48463278973101576
217	Y	D	0.48448239053681785
415	T	A	0.48350856919465257
49	E	F	0.4833047408803547
354	G	I	0.4831803998891725
174	S	L	0.48279714635158494
102	E	S	0.4827031683824387
268	E	F	0.48270286021815556
561	A	D	0.482646226115632
341	T	H	0.4821019506516392
43	P	T	0.48179642572606207
189	K	Y	0.48173528266628113
82	Q	F	0.4816344596613078
658	Q	C	0.48052648387111124
528	S	A	0.48030676560635743
299	P	G	0.4798632573794122
265	L	C	0.47980299263178156
409	G	C	0.4789961778134102
71	T	R	0.4788913848078037
87	E	R	0.47866316304185097
168	K	G	0.47859965472628363
335	K	M	0.4784093780598282
434	M	Y	0.47785991724664806
589	D	E	0.47775234696386176
503	R	H	0.4777314462781844
686	I	M	0.47740353714551864
492	E	V	0.4773089324014459
466	E	P	0.4771278096469545
525	A	L	0.477008282265882
248	T	R	0.4769893538036908
124	P	V	0.47698133270317705
496	V	R	0.4769525116517178
496	V	W	0.4769525116517178
489	V	S	0.47683861392989724
445	C	N	0.4767971941399586
543	N	E	0.4767683346962076
508	R	F	0.47673409841099257
184g	R	G	0.476448458640225
355	N	L	0.4762643954196194
520	L	Y	0.475430956483933
184f	N	V	0.47490709191659275
629	L	W	0.47428714107624637
389	G	D	0.47424975116841245
484	Y	V	0.4739550584275769
101	V	G	0.4733709544296292
550	Q	A	0.4732980635184388
73	A	G	0.47299198542244314
643	Y	V	0.47293058904701457
575	Q	K	0.4728224544940693
383	F	I	0.47270169462567474
331	C	Y	0.47267002144127634
280	N	Q	0.4725851200085582
114	Q	Y	0.4720296097836492
490	K	Y	0.47199077969665515
491	I	A	0.4717957908657843
138	I	L	0.47162606958966424
668	S	I	0.47147902131692526
635	I	N	0.47049029826152966
55	A	D	0.470342407499837
289	N	S	0.4702727958119083
653	Q	R	0.46997585416039045
162	T	N	0.4697324503201473
574	K	M	0.46964716990272637
358	I	P	0.4694850143017843
285	L	A	0.46942378322552547
605	T	F	0.46929714235480136
297	T	I	0.4679559446771982
238	P	K	0.4676058947612577
339	N	T	0.4674713997800335
317	F	V	0.467405794932801
383	F	Y	0.46692697402553507
94	N	D	0.46687525653002826
233	F	S	0.4660164528463667
615	S	A	0.4659794015348316
289	N	P	0.46589848180722104
674	D	Y	0.46579883572216896
694	G	V	0.46560667119686544
513	V	R	0.4654804832067609
199	S	A	0.46467307805366975
245	V	C	0.46467099826873626
461	T	C	0.46446773623274995
232	K	T	0.46374053893924394
487	K	E	0.46338228848914537
155	K	E	0.46326677815080747
271	M	L	0.46279969897189127
614	W	F	0.4625861064252314
573	I	M	0.46217850347738454
102	E	I	0.4617546597582674
224	A	S	0.4615265304314726
47	D	P	0.46133179529914636
439	I	R	0.4606414051418941
194	I	M	0.46054103129697466
223	F	E	0.45972909492144876
554	N	H	0.45968895544419414
483	L	F	0.4586647382852532
282	K	Q	0.45849641469570424
162	T	Y	0.4581996878772197
656	N	V	0.45818332492606695
386	N	L	0.4580701416959822
422	Q	L	0.45772767198630304
698	V	R	0.45701769759066657
130	Q	A	0.45666010550276304
266	A	G	0.45658336679080264
424	I	M	0.4564540506862631
230	D	H	0.45625365437257437
110	S	C	0.4561972731919369
270	V	T	0.4560992031477328
488	V	L	0.4558669354945687
587	L	I	0.4553567644755677
166	R	N	0.4551694302161526
140	D	Y	0.45486740228919725
664	D	E	0.45469906987093134
612	S	M	0.45458115680024724
396	I	H	0.4539384151604028
227	K	I	0.4525521182914606
303	T	A	0.45247490410893576
385	C	E	0.45236296168741097
346	V	N	0.45228811762932003
346	V	Y	0.45228811762932003
82	Q	M	0.4521398724067993
269	E	P	0.4514897008133865
338	W	I	0.4510661652974861
391	F	E	0.4508868480074154
391	F	M	0.4508868480074154
391	F	R	0.4508868480074154
365	S	N	0.4507854292148559
259	L	T	0.4499702559274956
360	R	W	0.4494428345135405
250	G	N	0.449381070873754
246	Q	W	0.44931722257311857
346	V	S	0.44913571158357374
609	P	C	0.44894842485604586
96	W	F	0.4487536025909844
403	Q	E	0.4484586652269023
442	V	L	0.4484163591129477
130	Q	T	0.44801678275506707
273	R	F	0.4477508530884374
248	T	S	0.4475500888159698
701	V	W	0.4471393928588757
249	H	A	0.44703781669459086
655	K	Q	0.4469406472194101
554	N	S	0.446918376049207
389	G	Q	0.4466280961687214
84	I	Q	0.44625386685712987
297	T	N	0.4457492887424624
463	S	L	0.4454583342467491
614	W	G	0.445244009126898
378	C	S	0.44500976715636664
260	L	P	0.44487515749905193
423	I	T	0.444785573476686
270	V	G	0.4445545933167844
556	L	F	0.4442628190383314
246	Q	L	0.44416032625222607
695	L	V	0.44386963605095553
437	P	Q	0.44374179198159036
680	W	L	0.4432859111958076
629	L	R	0.44268858372890896
184a	N	Q	0.4426753392810569
204	A	S	0.4417681303695686
354	G	F	0.4411993151736753
625	N	M	0.44118835736558515
355	N	P	0.44084653115803596
347	K	L	0.44035210209302844
509	E	I	0.440039677746612
470	P	H	0.4398149763450522
51	T	A	0.4396083790339536
398	N	T	0.439192727553786
289	N	M	0.43915394661834484
271	M	T	0.43861800722624344
274	S	Y	0.4377230442134904
335	K	F	0.4375866793982992
35	W	H	0.43750562691812944
267	E	C	0.4374004031593801
669	L	V	0.43733968772381965
471	G	D	0.4365196934938848
293	Q	M	0.43626209922477666
613	S	T	0.43609315073052746
69	W	Y	0.4360315067710185
74	C	G	0.435799545727948
398	N	Y	0.43574976410614497
365	S	F	0.43531129092941123
290	T	S	0.4345817477776164
184e	G	M	0.4345539984694765
667	A	L	0.4337449966667496
248	T	A	0.43373446416860706
293	Q	Y	0.4336155764130586
528	S	L	0.4335153263135241
228	C	Y	0.4334410230304382
343	G	A	0.43342661949098227
675	I	T	0.43307939953353436
306	S	D	0.43302977921169183
222	G	D	0.43276838825739544
315	Q	Y	0.43261471544098873
336	A	R	0.4323223159085977
625	N	S	0.4322471540090573
406	N	Y	0.43184476105285696
402	V	G	0.4312329344254787
617	R	Y	0.431134814062174
319	T	K	0.43067182179435703
386	N	A	0.4303188908158979
417	P	S	0.43029616128851567
41	G	S	0.4301796174154724
463	S	Q	0.43002750464016526
394	T	S	0.4300244144651469
372	T	S	0.42997199671746783
308	R	E	0.42943106158710476
31	A	G	0.4293923827653635
151	R	V	0.4286180678121154
110	S	D	0.42860422891837346
515	I	E	0.4283392149650715
697	I	G	0.4281650697237256
623	W	V	0.427798056981513
694	G	N	0.42772546493543595
484	Y	L	0.4272535308694885
697	I	K	0.42722362519131096
697	I	H	0.42722362519131096
522	F	L	0.4270262832830673
690	G	F	0.42690944942421577
89	V	L	0.42688471763205627
538	T	V	0.42644096593786585
471	G	R	0.42641958584668316
670	W	F	0.4263269632038668
223	F	L	0.4260544200976888
678	W	N	0.42604073573236706
616	N	Y	0.42584888300226165
537	L	V	0.42574169587850075
183	Q	R	0.42570580689738624
271	M	A	0.4253173206381562
247	C	D	0.42494640683739315
238	P	F	0.42486453444236016
135	T	E	0.4247520503608231
464	T	S	0.4247024883922242
165	L	S	0.42464186655271874
666	W	D	0.4245843017505438
282	K	D	0.42452896942021845
242	V	S	0.42442261210714666
133	N	W	0.4244019661054333
279	N	M	0.42437715564539313
276	N	P	0.4243180469202045
349	L	R	0.4242477839366481
291	P	Q	0.424241595499334
639	T	E	0.42421752881123603
184f	N	Q	0.42421566065433913
574	K	Y	0.42421385180704074
391	F	K	0.42417298096358386
274	S	Q	0.42416553975387955
390	L	A	0.42414491426146006
484	Y	M	0.4241290937497786
237	G	H	0.4241065591951873
261	L	Q	0.4240705593192702
109	I	Q	0.4240692101385467
52	L	K	0.42400359416201644
252	K	C	0.42397658935069366
267	E	H	0.4239449552504782
500	R	K	0.4239300404936811
515	I	W	0.4238239365920648
473	G	L	0.42371907308534124
518	V	D	0.42368262104081433
507	G	S	0.4236810826615701
197	N	K	0.4234773471837373
548	I	K	0.42345686289261797
99	N	G	0.4233276417791212
33	N	Q	0.4232916376219721
655	K	V	0.4229963349871221
297	T	L	0.4228596173953803
394	T	K	0.42261968674312056
590	Q	G	0.42257402630679963
445	C	L	0.4222844398799279
529	T	N	0.4221231463841094
592	L	H	0.4219723542140098
537	L	W	0.4216532145649182
462	N	C	0.4216009903709922
84	I	S	0.4213761228305153
68	V	D	0.42120777084576577
517	A	C	0.4209904439734747
317a	Y	T	0.42090971155041523
232	K	M	0.42043861258712545
51	T	S	0.42003776205586035
333	V	A	0.42003197778629164
357	T	C	0.4198378979824957
650	Q	H	0.4198189498010262
581	L	W	0.41931821804574426
500	R	C	0.4189570266355058
227	K	R	0.41894133657901933
156	N	T	0.41892382935432776
674	D	G	0.4187882830141103
285	L	V	0.41877761029998395
275	E	Q	0.4186317471715172
383	F	S	0.41844876772878276
497	A	F	0.41819400355396524
72	H	R	0.41810797408571654
184h	S	W	0.4178885259923981
437	P	G	0.41783885183170644
228	C	S	0.4177258792464434
652	Q	D	0.4172518725158531
125	L	P	0.4171253784960398
31	A	Q	0.4169875122278251
629	L	H	0.41668661456214806
336	A	V	0.4165392251334184
80	N	T	0.4163837196656047
215	I	N	0.4163132786330622
243	S	A	0.416311061463338
269	E	S	0.4162993912824993
156	N	F	0.416096196927363
124	P	N	0.41589951674073117
171	K	F	0.4158776501031781
363	N	R	0.41580409770489757
446	V	L	0.41576259332457377
161	M	H	0.4157389212714555
243	S	W	0.41439360657510804
120	V	Y	0.41435780306665226
184	I	F	0.41422160733246693
459	G	R	0.41415234232403125
667	A	T	0.41409294953006126
184h	S	H	0.4137297700171352
220	P	D	0.41356407897263425
395	W	R	0.4135633835587895
171	K	A	0.4134315943451544
157	C	Q	0.41342017505977857
167	D	Q	0.41339726856908376
158	S	E	0.4133813336573605
34	L	V	0.41332724830328454
163	T	Y	0.4133272110784851
174	S	I	0.41324555904973054
667	A	V	0.4131119499727296
61	Y	W	0.41299412650706085
240	P	Q	0.4127112840380205
471	G	F	0.41251127231485873
188	N	D	0.41249907887023274
453	I	G	0.412483567085579
189	K	I	0.4122571131659486
496	V	S	0.41206189656615905
172	V	F	0.4118100860854996
232	K	H	0.4117742066331279
63	T	I	0.4117150357759961
210	F	R	0.41170344794641633
344	K	Q	0.41146569209191025
607	N	R	0.4109806584239193
219	A	R	0.41016583108606075
234	N	R	0.41004533165692403
229	K	C	0.4100030874582237
47	D	N	0.40925180293599284
559	I	T	0.4091900247088792
179	L	V	0.40874779942643064
178	R	P	0.40870167409004265
675	I	Y	0.4085561327853853
174	S	Q	0.40855430669612747
643	Y	T	0.4084333825232693
141	D	G	0.40839261568213503
184b	E	I	0.40807133863339257
179	L	P	0.4080263524888374
396	I	A	0.4077549787973732
244	T	H	0.4076762594830495
151	R	P	0.4075681672350517
623	W	F	0.40732578624654925
356	N	T	0.40664551450268505
516	G	M	0.4063750355790816
522	F	G	0.40636407247601036
301	N	D	0.4063430231160594
275	E	A	0.4063013076947757
36	V	C	0.4062283863335361
235	G	E	0.40615053686953273
662	A	V	0.4057639334836136
604	C	A	0.4055880467826789
387	T	I	0.4055708998861147
227	K	A	0.4055358008860724
575	Q	A	0.4055303663684552
655	K	R	0.40519242170092473
432	Q	L	0.40504769264681095
265	L	A	0.4049544829433316
379	G	Y	0.40491179941253275
562	Q	F	0.40486730345015365
338	W	L	0.4047729785477629
490	K	I	0.4046651161230718
455	T	H	0.40449929840146137
422	Q	F	0.4041343040438155
470	P	E	0.4040864577430422
470	P	G	0.40408645774304214
451	G	L	0.40407281331412315
135	T	F	0.40402302886241803
453	I	D	0.40389767860583947
482	E	R	0.40389240219611205
505	V	D	0.4038320112275512
427	W	V	0.4037640638718734
427	W	E	0.4037640638718734
506	V	H	0.4036627463365201
691	G	S	0.4032371741861367
423	I	D	0.4030962176616874
407	S	W	0.40297860024553966
511	R	F	0.40284588140322053
420	I	D	0.4026938958354238
71	T	A	0.402642798591906
172	V	M	0.4025536499378032
102	E	P	0.4024144842299199
186	N	E	0.4021584976326949
426	M	D	0.40205176689273514
525	A	F	0.4020295431100769
494	L	E	0.40160240342475295
479	W	D	0.4013229471017852
684	I	G	0.4011415841307212
488	V	A	0.4009601788170938
449	I	F	0.4008620243935005
271	M	K	0.40084527221783994
619	L	N	0.40079970125819103
553	S	R	0.40007247055203576
599	S	I	0.4000474514952485
669	L	P	0.4000149959458207
388	S	R	0.39970911267004283
322	I	S	0.3994950957122936
481	S	A	0.3992483831000622
232	K	V	0.3991998928540287
339	N	G	0.3990918076998514
305	K	E	0.3989890755052614
363	N	S	0.39886648528968044
298	R	K	0.39865636883361477
583	V	G	0.3986009106010718
505	V	M	0.3980451966501259
360	R	S	0.39750910094448166
107	D	N	0.3973151204149482
682	I	L	0.39707166612081346
387	T	S	0.39692343784646866
130	Q	N	0.3964365860455094
276	N	Y	0.39612957969386914
473	G	A	0.3959095924919359
689	V	W	0.3958006242738482
175	L	V	0.39573768327782977
97	K	C	0.39532591788711413
333	V	G	0.3951078430303104
82	Q	L	0.394833606565547
506	V	A	0.3947302249042722
528	S	M	0.3940507377062876
95	M	C	0.3939529367738157
163	T	K	0.39368236774972
138	I	N	0.3935800294025448
185	N	G	0.39341744922918065
152	G	E	0.39318855178178436
390	L	H	0.3927706221012424
436	A	P	0.3923012522589728
600	G	E	0.39210373352672956
180	D	V	0.39208049333760236
186	N	Y	0.3912460509564516
151	R	T	0.3911129084748328
240	P	L	0.3910707994504409
623	W	N	0.3910312333437647
665	K	M	0.39092844964860574
686	I	E	0.3907069699883727
650	Q	C	0.3906783382680523
497	A	S	0.39058928883298033
217	Y	N	0.39006337456598994
512	A	S	0.38979744796123017
612	S	G	0.3897364553336114
672	W	N	0.38970192125394343
142	M	K	0.3896528813575492
676	S	L	0.3896310392018347
530	M	A	0.3894751595954577
530	M	W	0.3894751595954577
345	V	E	0.3889653708500619
504	R	L	0.38890191145044334
68	V	T	0.38831596152359404
329	A	L	0.3881471575406151
206	P	G	0.38802731131970797
585	R	T	0.3880071636379774
136	N	A	0.3880027544001603
568	L	F	0.3877564313106859
367	G	E	0.38755725549640985
331	C	H	0.38723261145597565
139	T	I	0.387172021903407
410	S	L	0.3860238185826201
600	G	I	0.38595632629523774
134	V	S	0.3850922975052043
649	S	I	0.38383201695575797
493	P	T	0.3832300053745245
126	C	L	0.38306658072425587
97	K	F	0.38289193225119694
41	G	L	0.3828398145841245
518	V	R	0.3826242900309545
402	V	C	0.38242685124459386
53	F	P	0.3823462171761831
51	T	E	0.382257080193307
407	S	L	0.3821238907812772
295	N	G	0.3819424651722901
623	W	L	0.38190453968639093
648	E	N	0.38173748103213073
112	W	G	0.3815439424135287
326	I	D	0.38138380554409684
637	N	D	0.38124841315811625
257	T	F	0.38123061416727466
317a	Y	M	0.3812199239280424
459	G	H	0.3811642880919447
307	I	A	0.3810967730050468
341	T	P	0.38104106404187416
198	T	Y	0.38102473828314865
369	L	D	0.3809724300271348
240	P	T	0.38091362314905974
91	E	V	0.38035931564750625
317a	Y	R	0.380247852847054
567	K	D	0.3800733203231588
332	N	A	0.3799862600042007
529	T	S	0.3797587975762343
460	S	G	0.3797419790015127
448	N	E	0.37973709136775796
169	K	W	0.3797085170357415
336	A	P	0.3796581189646252
366	G	T	0.3792800297569198
524	G	C	0.37910429478610685
139	T	L	0.3791011166620942
351	K	C	0.3786232565003882
300	N	V	0.378222951028325
95	M	A	0.3779798329817291
352	H	Q	0.3777584325538823
660	L	V	0.37753778150591205
615	S	G	0.37726430833919705
89	V	Y	0.3772110236371552
184h	S	E	0.3770007539275888
639	T	Q	0.37672175421668835
386	N	H	0.37656187091130533
195	N	I	0.37642354242614706
200	A	K	0.37635583749544704
549	V	C	0.3761810642161252
285	L	H	0.3760814492767637
451	G	S	0.37574333235199264
521	G	H	0.37558555657424125
414	I	L	0.3755762514123488
268	E	G	0.37552605311385945
571	W	G	0.3755216482032796
700	A	S	0.37545720676732236
217	Y	C	0.3754387818197742
133	N	F	0.37503747852461844
76	P	R	0.37479742284833806
142	M	D	0.37470432191436126
507	G	P	0.37465461407485023
392	N	G	0.37434422242184806
538	T	M	0.3742415012554115
698	V	W	0.3740099653037771
578	A	T	0.3739524166523184
210	F	C	0.3739151361217192
335	K	A	0.3732719884579808
545	L	Y	0.37322687058312143
151	R	D	0.3724813816412486
318	A	T	0.3721188512573246
391	F	L	0.3719491686442781
477	D	G	0.3719072963470534
677	N	V	0.37185061982844153
158	S	Y	0.37169768067147474
466	E	S	0.37164399923442115
402	V	Q	0.3715704099049426
227	K	D	0.37132255785525464
572	G	S	0.37099933194260404
216	H	E	0.3707259318638231
124	P	R	0.37054996197962387
362	A	P	0.3703270744585054
54	C	R	0.3702970035758775
297	T	W	0.3702798761007237
211	E	I	0.37023912790047714
702	L	Y	0.3702100342277215
648	E	I	0.37010871926142686
286	V	P	0.37001379200450163
317a	Y	S	0.3699010614839988
116	L	I	0.3698587841525142
313	P	W	0.36980207599371184
31	A	S	0.3697023729756203
80	N	A	0.3696268261543952
287	Q	Y	0.36939819909970856
546	S	E	0.369322631727516
574	K	H	0.3692747755810314
318	A	N	0.36925682434084617
348	Q	G	0.36903558660170144
249	H	I	0.3687219279449996
410	S	W	0.3684449130575128
348	Q	M	0.3683810348942321
306	S	W	0.36836936330487857
301	N	F	0.36832657878408426
625	N	C	0.3680844193431587
327	R	E	0.36807441065483393
478	N	R	0.3677379683020763
235	G	R	0.36704537606418786
600	G	P	0.3668901371708232
656	N	G	0.3665951405944243
545	L	E	0.3665632174224782
155	K	A	0.36632321040690563
278	T	P	0.36621984464308205
184g	R	M	0.36621174916525473
363	N	A	0.36598863824451144
396	I	N	0.36580328122550126
308	R	K	0.36574528399218803
663	L	H	0.3656890556603541
263	G	D	0.36545682464295526
244	T	V	0.365234685629156
301	N	I	0.36515479156452535
363	N	V	0.3648545519982633
682	I	F	0.36439783506085044
214	P	D	0.36439357944135486
356	N	H	0.3642776829718719
622	I	S	0.36424756411049913
59	K	N	0.36399366576937475
643	Y	H	0.3637656698364832
231	K	Y	0.3630723506576054
656	N	S	0.3629720590714649
461	T	W	0.36290676817784107
290	T	R	0.3627711078751941
137	N	R	0.36261493995600896
691	G	A	0.3624682216344631
206	P	Q	0.3624291213346984
414	I	W	0.3620513486151326
474	D	L	0.36189506960965134
334	S	R	0.3617186180705203
352	H	R	0.3615030732151367
51	T	D	0.36148351407650353
656	N	H	0.36141849750959726
696	R	S	0.36136758954446635
336	A	E	0.3608684082504402
571	W	L	0.3608435741045469
269	E	T	0.3604276379589998
448	N	A	0.3603134119554922
535	M	V	0.36015625100481147
184a	N	M	0.36013474579779614
204	A	H	0.35994076081645676
84	I	G	0.35990754958822957
182	V	L	0.35971338370049855
659	D	I	0.3596888822675952
449	I	N	0.3596186054450441
287	Q	N	0.35953408551964483
648	E	L	0.3591177780962424
437	P	R	0.35840595955092625
170	Q	N	0.3578513441459506
478	N	Y	0.3577782839859208
259	L	V	0.35772396757652686
181	V	Q	0.35768654856169435
67	N	H	0.35744776860190397
355	N	H	0.35743701937104794
218	C	L	0.3573114725881402
183	Q	S	0.35715222691351545
454	L	F	0.3569465820755689
406	N	W	0.3569087603330299
350	R	W	0.35684495415266354
685	F	V	0.35682970981352746
205	C	A	0.35675544718473146
337	T	I	0.3566181598259962
160	N	V	0.35639691410730967
192	R	Q	0.35618058685091347
530	M	I	0.35587462110210316
173	Y	G	0.35580772751753886
240	P	D	0.3557909491676726
605	T	Y	0.3548356470991245
440	Q	R	0.3547332556057232
136	N	E	0.3543218727898575
564	H	Q	0.35395043139933
51	T	R	0.35389603986022433
663	L	W	0.3537496591404051
138	I	K	0.3537438929018172
334	S	P	0.3534433703784694
347	K	S	0.353058073851944
184e	G	R	0.35268811605596134
669	L	S	0.3521741956308848
525	A	G	0.35212128810786597
115	S	T	0.35197737853194555
689	V	F	0.35187072704337985
689	V	S	0.3517847215423596
502	K	P	0.35171912321834703
502	K	F	0.35171912321834703
236	T	V	0.35157823778316655
287	Q	L	0.3510621268605414
679	L	G	0.3510283181465638
328	Q	W	0.3509791261144828
59	K	S	0.3508494132423002
45	W	N	0.35080713896160054
98	N	M	0.35079781111793995
134	V	T	0.35045220055990517
115	S	W	0.3504434342722742
641	I	M	0.34986913911917
135	T	N	0.34970970325903045
372	T	I	0.34949602672683877
666	W	Y	0.34947857233548507
686	I	V	0.3493429524161825
453	I	L	0.3492695967969097
270	V	R	0.34887395124612547
289	N	Y	0.34879272597679223
101	V	A	0.3485900120101462
254	V	A	0.3485038747552485
[truncated: 11,401 more rows]
